# Supplementary material for: Maternal Sleep and the Risk of Childhood Infections: Findings from the Rhea Birth Cohort in Greece
Source: Research Square preprint supplement (doi:10.21203/rs.3.rs-7633169/v1), 2025-10-15
Supplement: Supplementary file 1 [file eff5d47de565419342d2df2d.docx]

**Appendix S1.** *Maternal sleep questionnaire (english version)*

1. Sleep duration. How many hours do you usually sleep per day during your pregnancy?
2. More than 10 hours
3. 8–9 hours
4. 6–7 hours
5. 4–5 hours
6. Less than 4 hours
7. Don’t know / Prefer not to answer
8. Epworth Sleepiness Scale. What is the probability, when you are not feeling tired, that you would doze off briefly or fall asleep in the following situations?

(The questions refer to your usual lifestyle in recent times. Even if you have not done some of these activities recently, try to estimate how they would affect you.)

*0 = No chance of dozing*

*1 = Slight chance of dozing*

*2 = Moderate chance of dozing*

*3 = High chance of dozing*

1. Sitting and reading

☐ No chance of dozing

☐ Slight chance of dozing

☐ Moderate chance of dozing

☐ High chance of dozing

2. Watching television

☐ No chance of dozing

☐ Slight chance of dozing

☐ Moderate chance of dozing

☐ High chance of dozing

3. Sitting inactive in a public place (e.g. theatre, meeting)

☐ No chance of dozing

☐ Slight chance of dozing

☐ Moderate chance of dozing

☐ High chance of dozing

4. As a passenger in a car for one hour without a break

☐ No chance of dozing

☐ Slight chance of dozing

☐ Moderate chance of dozing

☐ High chance of dozing

5. Lying down to rest in the afternoon

☐ No chance of dozing

☐ Slight chance of dozing

☐ Moderate chance of dozing

☐ High chance of dozing

6. Sitting and talking to someone

☐ No chance of dozing

☐ Slight chance of dozing

☐ Moderate chance of dozing

☐ High chance of dozing

7. Sitting quietly after lunch without alcohol

☐ No chance of dozing

☐ Slight chance of dozing

☐ Moderate chance of dozing

☐ High chance of dozing

8. In a car, while stopped for a few minutes in traffic

☐ No chance of dozing

☐ Slight chance of dozing

☐ Moderate chance of dozing

☐ High chance of dozing

**Appendix S2.** *Multiplex IgG serology*

Antigen-specific IgG was measured in plasma samples against a panel of 25 antigens from different common pathogens by quantitative suspension array technology using a FlexMap-3D analyzer and 384 well plates. For the Luminex assays, samples were randomized keeping those from the same children (different time-points) together in the same assay plate. Antigens included in the Luminex panel were: five viral capsid proteins 1 from five polyomaviruses (BKPyV, JCPyV, KIPyV, WUPyV, MCPyV), four Epstein-Barr virus (EBV) antigens (ZEBRA, EBNA-1, EA-D, VCA p18), four Cytomegalovirus (CMV) antigens (pp52, pp65, pp150, pp28), eight *Helicobacter pylori* proteins (GroEL, UreA, NapA, HpaA, CagA, VacA, HcpC, Omp), one Adenovirus 36 antigen (Adv 36 fiber protein) and one *Toxoplasma gondii* antigen (Toxo-sag2). Twenty 384 well plates were analyzed, each of them containing 334 test samples, 8 serial dilutions of a positive control, 38 negative controls and 4 technical blanks. The positive control consisted in a pool of 4 samples reactive to the different antigens of the panel plus the anti-Toxoplasma IgG human reference reagent 01/600 from NIBSC. The purpose of the positive control was for quality control of the assay and to normalize the data by correcting the interplate variability. The negative controls consisted on samples from previously defined seronegative individuals to the different antigens tested. The purpose of the negative controls was to help to establish the cut off of seropositivity for each antigen. Technical blanks consisted of Luminex Buffer (1% BSA, 0.05% Tween20, 0.05% sodium azide, 0.005% Triton X- 100 in PBS) incubated with microspheres without samples and their purpose was to detect background signal from non-specific binding of IgGs to microspheres. Previously to the assay, test samples and negative controls were pre-diluted at 1/100 in 96- round well plates and kept at -80ºC until the day of the assay. For the positive control, a stock of 8-serial dilutions (1/1000, 1/2000, 1/4000, 1/8000, 1/16000, 1/32000, 1/64000 and 1/128000) was aliquoted and kept at -80ºC until the day of the assay. The day of the assay, antigen-coupled microspheres were added in multiplex to 384-well plates and mixed with the test samples, negative and positive controls and blanks. The loading of microspheres and samples on the 384 well plates was performed with a 384-channels Integra Viaflo semi-automatic device and an Integra Assist Plus device with 12-channels Voyager pipette. Final dilution of test samples and negative controls was 1/1000. Plates were incubated for 1 h at room temperature in agitation (Titramax 1000) at 900 rpm and protected from light. Then, the plates were washed three times with 200 μL/well of 0.05% Tween 20 in PBS, using a BioTek 405 TS microplate washer (384-well format). Next, 25 μL of goat anti-human IgG-phycoerythrin (PE) (GTIG-001, Moss Bio) diluted 1:400 in Luminex buffer was added to each well and incubated for 30 min. Plates were washed again and microspheres resuspended with 80 μL of Luminex Buffer, covered with an adhesive film and sonicated 20 seconds on a sonicator bath platform, before acquisition on the Flexmap 3D® reader. At least 50 microspheres per analyte and per well were acquired, and median fluorescence intensity (MFI) was reported as a measure of antigen-specific IgG levels in each plasma sample. Raw data was exported with Xponent and managed with R and R-studio for quality control assessment and normalization to correct for the inter-plate variability. Data normalization was performed by antigen and plate using the MFI values of the first dilution (1/1000) of the positive control and applying the following ratio: MFI of test sample x MFI 1st dilution of the positive control of the plate/mean of MFIs of 1st dilution of all positive controls from all plates

*Determining seropositivity thresholds*

Determining the MFI signal threshold above which an individual was considered to be IgG positive (seropositive) for each of the antigens in the study was based on finite mixture models (FMM) except for *H. pylori* and JCPyV that were based on a cutoff estimated using the negative controls. FMM is a well-established data driven method for identifying past exposure to infection. FMM assumes the presence of classes or groups in a set population, and provides theoretic thresholds between the subpopulations. We expected two sub-populations for each antigen tested (exposed/non-exposed). We applied FMM to the log10-transformed IgG levels of each antigen tested at 4, 6 and 11 years old to classify children as exposed/ non-exposed at each age according to their antibody levels. We used the statistical package flexmix version 2.3-18 in the R statistical software version 4.1.0. This package uses an expectation-maximization algorithm that uses maximum likelihood to estimate model parameters. It also calculates the probability of belonging to each subpopulation for every observation. To make sure the models ran were reliable, we used a bootstrap of 100 repetitions for each age group. This way we could find the best FFM model for each antigen. Antigen-specific cut offs were then calculated as the mean MFI of samples that were identified as seronegative plus 3 times the standard deviation. Cut-offs for *H.pylori* and JCPyV were based on negative controls from the Rhea cohort. These cut offs were calculated as 10 to the mean plus 3 standard deviations of log10-transformed MFIs of the negative controls for each antigen as previously reported in other studies. EBV and CMV seropositivity were defined as seropositivity for at least 2 virus-specific antigens whereas *H.pylori* seropositivity was defined as seropositivity for at least 3 pathogen-specific antigens.

**Table S1**. Average time at risk (years) for Cox proportional hazard analysis of maternal sleep characteristics and risk of infection in children.

| Infection | Average time at risk  (years) | Infection | Average time at risk (years) |
| --- | --- | --- | --- |
| BKPyV | 4.3 | EBV | 5.0 |
| JCPyV | 5.0 | CMV | 5.3 |
| KIPyV | 4.6 | *H. pylori* | 5.3 |
| WUPyV | 4.7 | Avd-36 | 5.0 |
| MCPyV | 4.5 | T.gondii | 4.9 |

**Table S2**. Cross-tabulation of all maternal sleep characteristics.

|  | Excessive daytime sleepiness | | p-value |
| --- | --- | --- | --- |
| Sleep disturbances | no | yes | 0.28 |
| no | 434 | 35 |  |
| yes | 67 | 9 |  |
| ≤ 7 hours of sleep |  |  | 0.16 |
| no | 316 | 33 |  |
| yes | 185 | 11 |  |
| Snoring |  |  | 0.15 |
| no | 405 | 31 |  |
| yes | 96 | 13 |  |
|  | Sleep disturbances | |  |
| ≤ 7 hours of sleep | no | yes | 0.76 |
| no | 302 | 47 |  |
| yes | 167 | 29 |  |
| Snoring |  |  | 0.31 |
| no | 379 | 57 |  |
| yes | 90 | 19 |  |
|  | ≤ 7 hours of sleep | |  |
| Snoring | no | yes | 0.95 |
| no | 280 | 156 |  |
| yes | 69 | 40 |  |

**Figure S1.** Adjusted estimates of the association between maternal indicators of poor sleep during pregnancy and the risk of infection in offspring (n=545).

Caption: Forest plots, hazard ratios (HR), 95% confidence interval and p-value for maternal (n= 545) sleep characteristics and infections [Polyomaviruses (BKPyV, JCPyV, KIPyV, WUPyV, MCPyv), herpesviruses (EBV, CMV), Adenovirus-36 (Adv-36), *Helicobacter pylori* (*H.pylori)* and *Toxoplasma gondii* (*T.gondii*)] in offspring. In red, statistically significant associations. Models are adjusted by maternal age, maternal education, marital status, pre-pregnancy BMI, smoking at 30 weeks of gestation and children’s sleep duration at age 4.

**Figure S2**. Adjusted estimates of the association between maternal sleep score and the risk of infection in offspring (n= 545).

Caption: Forest plots, hazard ratios (HR), 95% confidence interval and p-value for maternal adverse sleep score and infections [Polyomaviruses (BKPyV, JCPyV, KIPyV, WUPyV, MCPyv), herpesviruses (EBV, CMV), Adenovirus-36 (Adv-36), *Helicobacter pylori* (*H.pylori)* and *Toxoplasma gondii* (*T.gondii*)] in offspring. In red, statistically significant associations. The numbers below each antigen indicated the sleep score assessed. Sleep scores (0 to 4) encompasses all the sleep characteristics evaluated in this study. Higher scores reflect poorer sleep. Models are adjusted by maternal age, maternal education, marital status, pre-pregnancy BMI, smoking at 30 weeks of gestation and children’s sleep duration at age 4.
